# Supplementary figures and images for: Drosophila TRPγ is required in neuroendocrine cells for post-ingestive food selection
Source: eLife journal article supplement (doi:10.7554/elife.56726), 2022-04-13

Figure 4-figure supplement 1

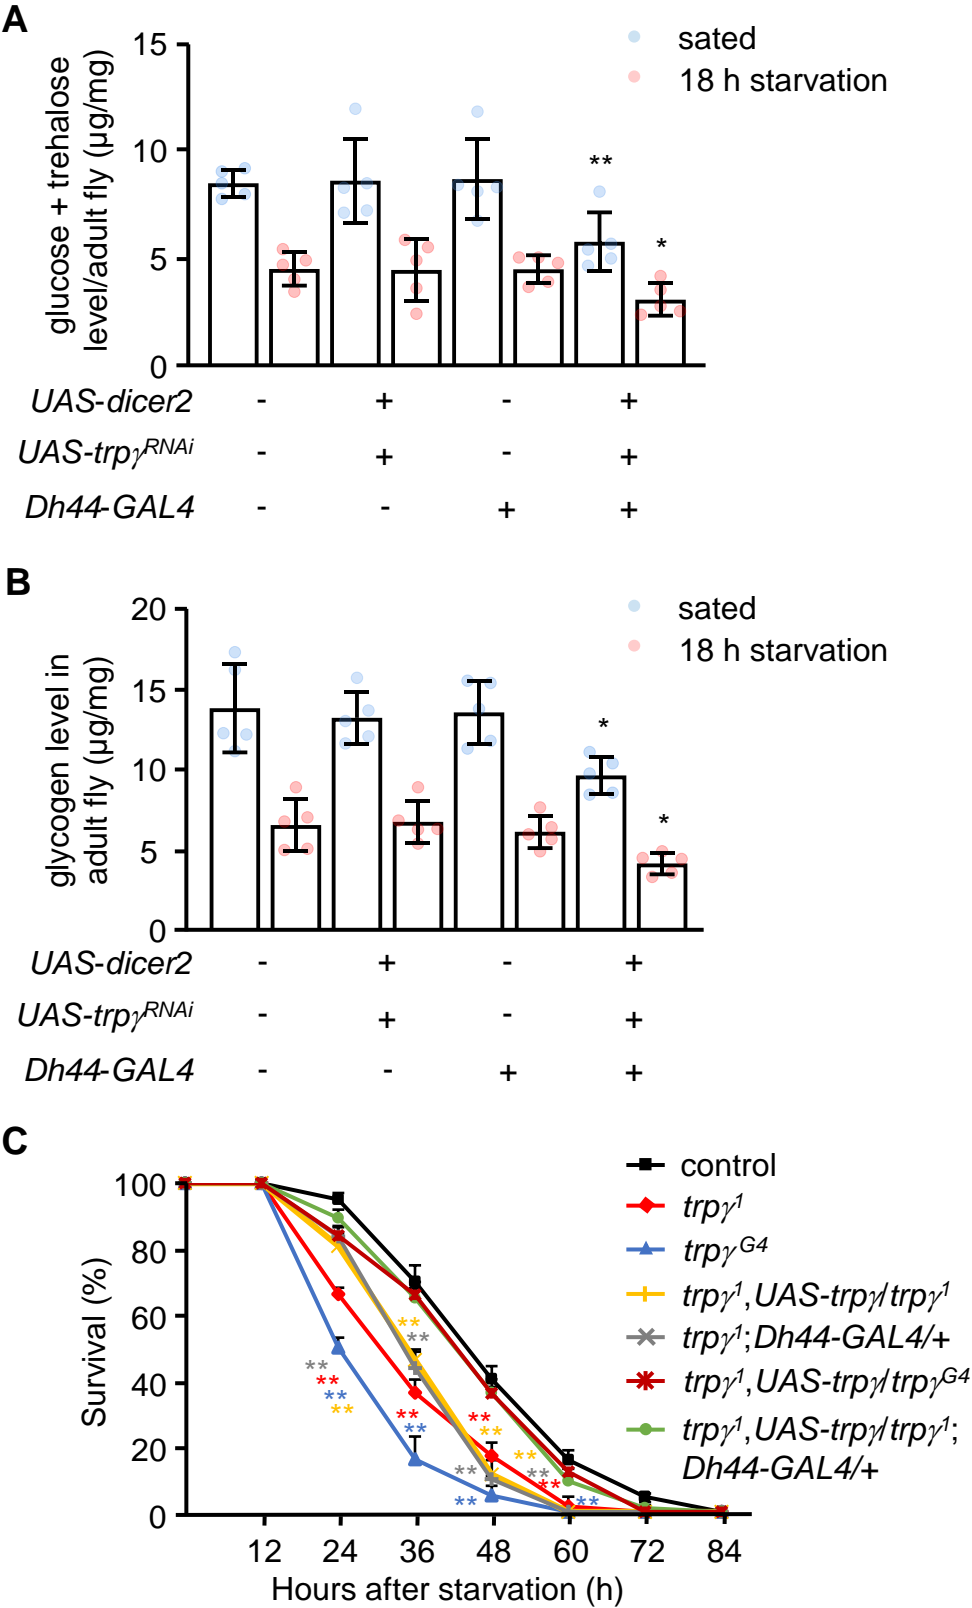

Supplement: supp [file elife-56726-supp-v1.zip]

# Figure 1-figure supplement 1

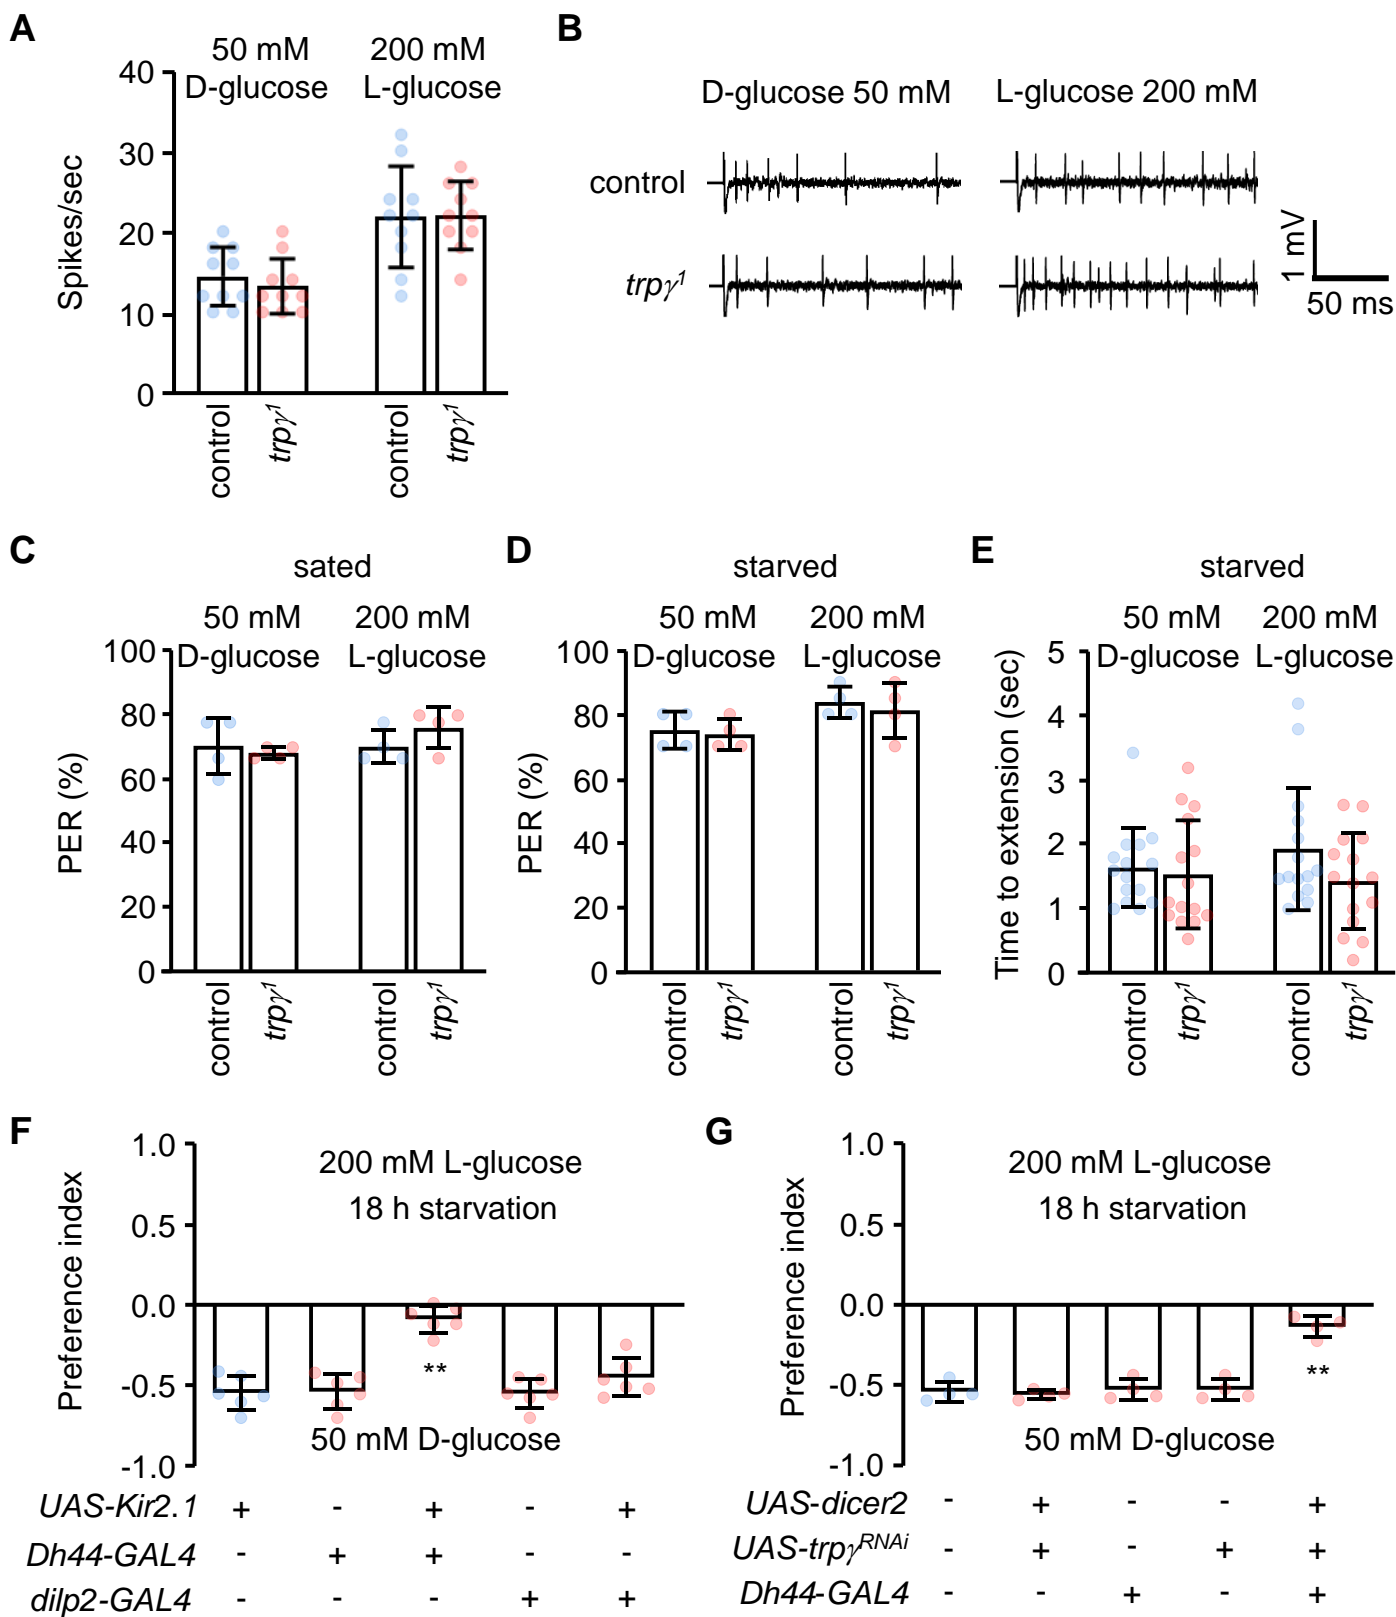

Supplement: supp [file elife-56726-supp-v1.zip]

Figure 6-figure supplement 1

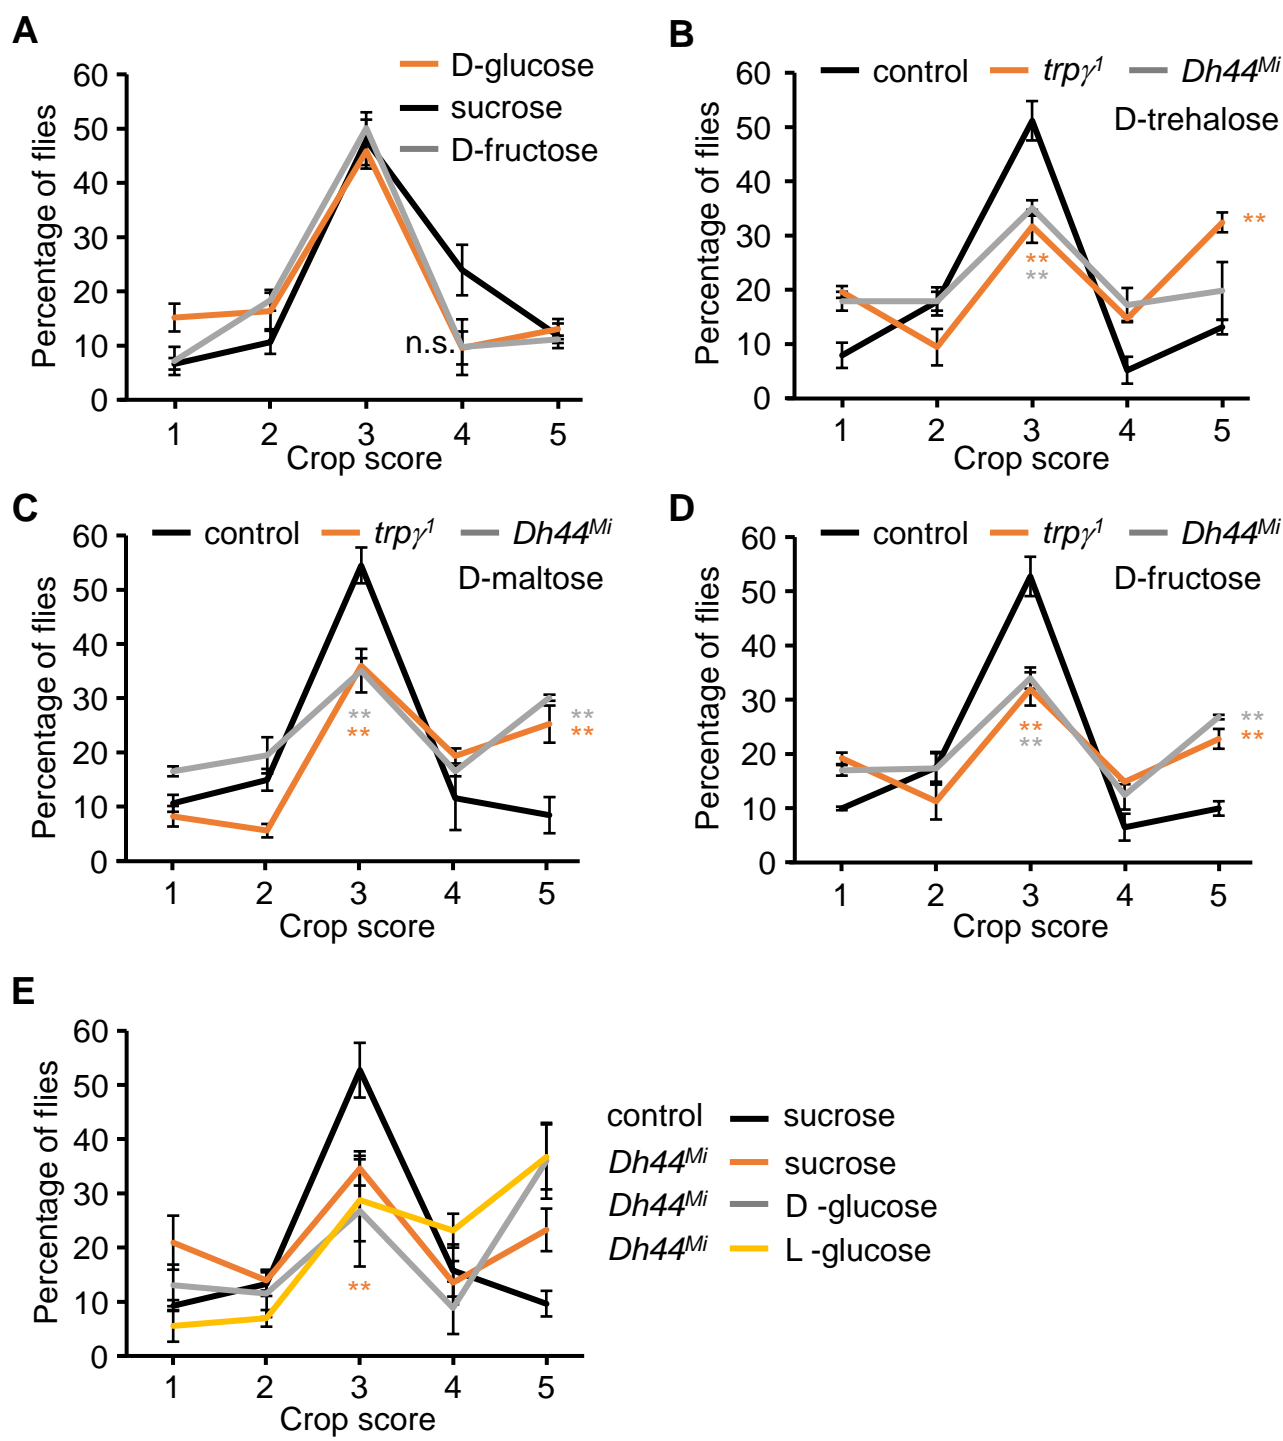

Supplement: supp [file elife-56726-supp-v1.zip]

Figure 7-figure supplement 1

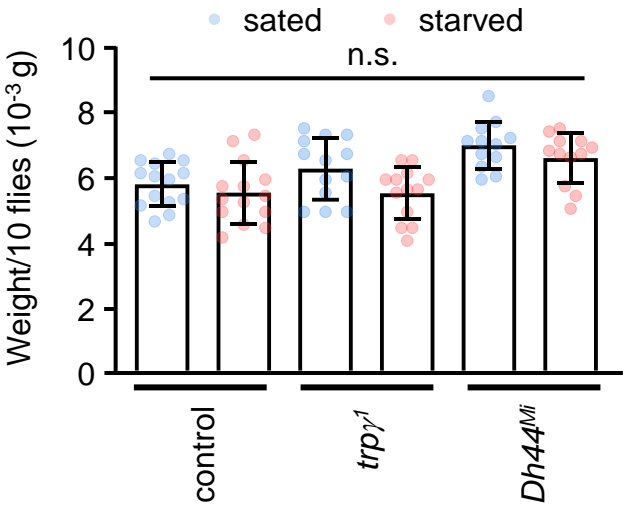

Supplement: supp [file elife-56726-supp-v1.zip]

Figure 5-figure supplement 1

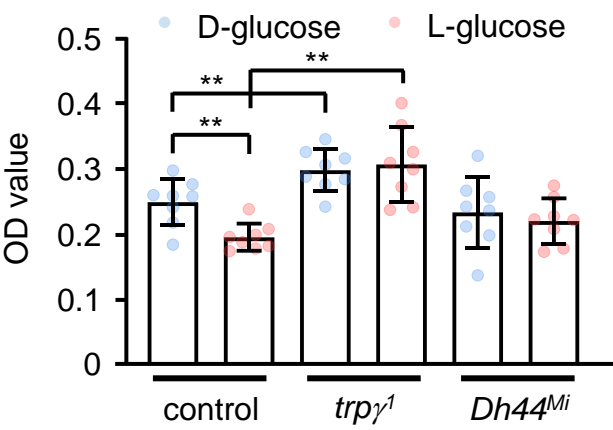

Supplement: supp [file elife-56726-supp-v1.zip]

# Figure 3-figure supplement 1

**A**

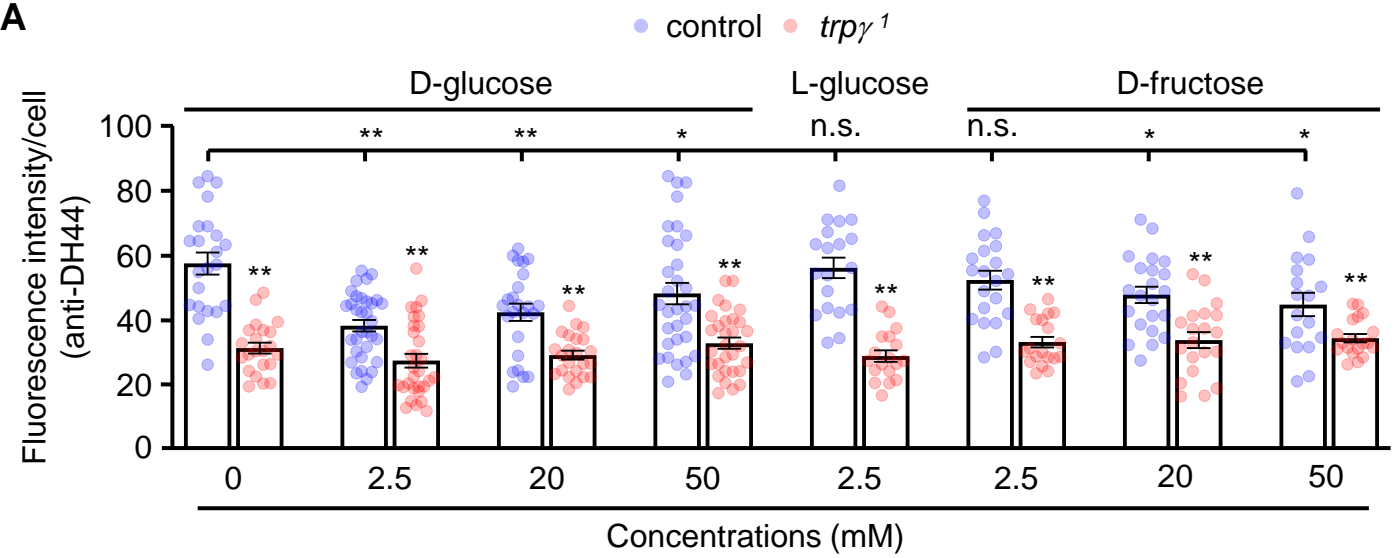

**B**

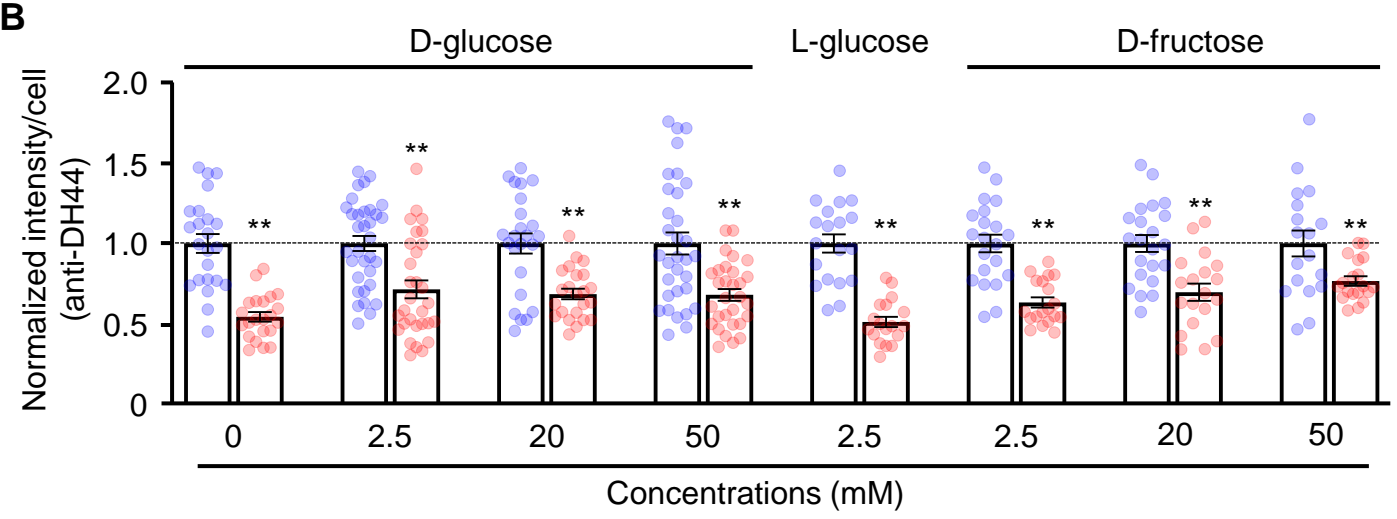

**C**

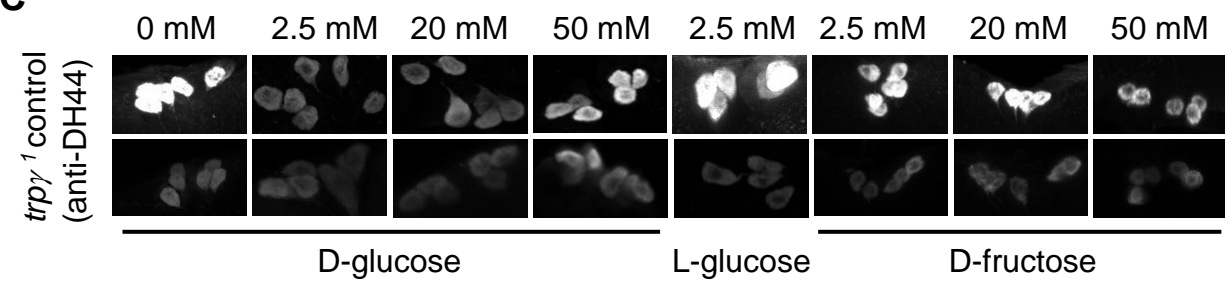

Supplement: supp [file elife-56726-supp-v1.zip]

Figure 2-figure supplement 1

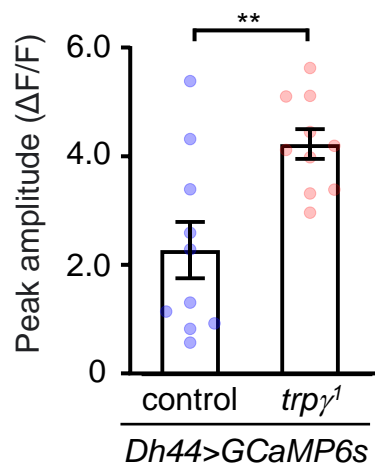

Supplement: supp [file elife-56726-supp-v1.zip]
